# Supplementary material for: Concurrent binding to DNA and RNA facilitates the pluripotency reprogramming activity of Sox2
Source: PubMed Central journal article supplement — Nucleic Acids Res. 2020 Feb 4;48(7):3869–87. doi: 10.1093/nar/gkaa067 (PMC7144947; doi:10.1093/nar/gkaa067), 2020-02-04

## Legends of supplementary data

**Supplementary Table 1.** Randomly selected DNA sequences for RNA library.

**Supplementary Table 2.** The sequences of 51 unique RNAs bound to Sox2 after 12 cycles of SELEX. The enriched motifs are underlined.

**Supplementary Table 3.** Sequences for RNAs and DNAs used for binding assays. Substituted bases are underlined.

**Supplementary Table 4.** Primers used for plasmid constructions. The restriction sites are underlined. Sequence for FLAG tag is highlighted in bold face.

**Supplementary Table 5.** Oligos used for RNA SELEX library construction. The T7 promoter sequence is underlined.

**Supplementary Table 6.** Primers used for ChIP-qPCR.

**Supplementary Table 7.** Primers used for RT-PCR and qRT-PCR.

**Supplementary Figure 1.** Purification of Sox2. Purified Sox2 was separated with a 12% SDS-PAGE gel and subjected to Coomassie blue staining (CS) and Western blot (WB).

**Supplementary Figure 2.** PAR-CLIP RNA targets of Sox2 in HEK293T cells. **(A)** Genome distribution of RNA species identified by Sox2 PAR-CLIP sequencing. **(B)** Top motifs identified by DREME in PAR-CLIP targets. The “CCCY” (where Y is A or G) motif (framed in red) was identified in intronic regions with E-value=1.2e-011.

**Supplementary Figure 3.** Verification of RNA binding motif of Sox2. **(A)** Comparison of the binding activities of Sox2 and Sox2- $\Delta$ RBM to the 12<sup>th</sup>-24 and 12<sup>th</sup>-24 Mut6 RNAs. Concentrations of Sox2 constructs are labelled above each lane. The percentages of bound RNA are indicated under each lane. Free RNA and protein-RNA complex are marked. **(B)** Schematic representation of the various His<sub>6</sub>-Sox2 constructs used for binding assays. **(C)** Coomassie blue staining of purified His<sub>6</sub>-Sox2 constructs. M: protein marker and sizes are shown in kDa. **(D-E)** Comparison of the binding capacities of Sox2 constructs to the 12<sup>th</sup>-24 RNA and mutants thereof. Fractions of bound RNA (left panels) were determined by EMSAs (right panels) using densitometric analysis with the ImageQuantTL software. Concentrations of Sox2 constructs are labeled above each lane. Free RNA and protein-RNA complex are marked. Barplots represent the mean  $\pm$  SD (n=3). **(F)** EMSAs to probe binding of Sox2(120-319) and Sox2(180-319) to the 12<sup>th</sup>-24 RNA and mutants thereof. Concentrations of Sox2 constructs are labelled above each lane. The percentages of bound RNA are indicated under each lane. Free RNA and protein-RNA complexes are marked.

**Supplementary Figure 4.** Defining sequence determinants of the Sox2-RNA interaction. **(A-G)**

Secondary structures of the RNA constructs based on 12<sup>th</sup>-24 were predicted using Mfold (<http://unafold.rna.albany.edu/?q=mfold>). Mutated bases are highlighted in red. **Of note:** 12<sup>th</sup>-24 Mut6 is predicted to induce profound structural changes. EMSAs were performed with increasing concentrations of Sox2 (**H**) or Sox2- $\Delta$ RBM (**I**) and the 12<sup>th</sup>-24 RNA, Mut2, Mut4 and Mut5. Fractions of bound RNA are calculated. Barplots represent the mean  $\pm$  SD (n=3).

**Supplementary Figure 5.** Characterizing exogenous constructs and pluripotency gene expression in reprogramming. **(A)** The relative transcript levels of exogenously expressed Oct4, Klf4, c-Myc, and Sox11 or Sox2 at day 4 of reprogramming were analyzed by qRT-PCR. Barplots represent the mean  $\pm$  SD (n=3). **(B)** The relative transcript levels of selected pluripotency markers were analyzed by qRT-PCR. Data are represented as mean  $\pm$  SD (n=3). ANOVA was used to assess significance (\*\* P < 0.01).

**Supplementary Figure 6.** Characterizing the effects of Sox2- $\Delta$ RBM and Sox2- $\Delta$ HMG on intact Sox2 in reprogramming. **(A)** The relative transcript levels of exogenously expressed Oct4, Klf4, c-Myc, Sox2 at day 4 of reprogramming were analyzed by qRT-PCR. Barplots represent the mean  $\pm$  SD (n=3). **(B)** The relative transcript levels of selected pluripotency markers were analyzed by qRT-PCR. Data are represented as mean  $\pm$  SD (n=3). ANOVA was used to assess significance (\* P < 0.05, \*\* P < 0.01).

**Supplementary Figure 7.** Evaluation of the effects of RBM on Sox2-chromatin and Sox2-Oct4 interactions. **(A)** Chromatin immunoprecipitation (ChIP) analysis for Sox2 and Sox2- $\Delta$ RBM on core pluripotent genes in reprogramming MEFs at day 4. Relative enrichments to IgG-ChIP control (upper panel) are shown. ChIP-Seq binding view of the above genes in MEFs after 48-hour infected with Oct4, Sox2, Klf4 and c-Myc, pre-iPSCs-1, pre-iPSCs-2 and mESCs are also shown [1]. Images were created with the Integrative Genomic Viewer (IGV) [2]. Data are normalized to total counts, and the scale range is 0-20. The regions used for qPCR testing are highlighted under each panel. **(B)** MEF cells were transfected with FLAG<sub>3</sub>-Sox2 along with Oct4, Klf4 and c-Myc. Co-immunoprecipitations were performed with IgG or anti-FLAG antibodies as shown on the top of each panel and immunoblots were done with anti-FLAG, anti-Sox2 and anti-Oct4.

**Supplementary Figure 8.** Comparison of gene expression and alternative splicing between reprogramming cells transduced with OKMS, OKM $\Delta$ HMG and OKM $\Delta$ RBM at day 12. **(A)** Heatmap depicting different expression of early ecto-, endo-, and mesodermal genes during reprogramming with Sox2, Sox2- $\Delta$ HMG, and Sox2- $\Delta$ RBM alongside OKM. **(B)** The Venn diagram comparing the alternatively spliced genes between OKMS versus OKM $\Delta$ RBM and OKMS versus OKM $\Delta$ HMG. **(C)** Scatterplot comparing exon inclusion changes in OKMS versus OKM $\Delta$ HMG to those in OKMS versus OKM $\Delta$ RBM. Pearson correlation coefficient value is shown in top right corner.

**Supplementary Figure 9.** RIP of indicated transcripts in mESC using anti-Sox2 antibody. RIP enrichment was measured by qRT-PCR, and values were compared to background immunoprecipitation measured by isotype IgG. ANOVA was used to assess statistical

significance (\*  $P < 0.05$ , \*\*  $P < 0.01$ ).

**Supplementary Figure 10.** Characterization of nucleotide composition around 5' splice sites. Nucleotide frequencies around the 5' splice sites of exons affected ( $n = 749$ ) and unaffected by AS ( $n = 14,342$ ). The exon sequences used are from **Figure 7E**.

**Supplementary Figure 11.** EMSAs to compare the binding activities of Sox2(180-319) (**A**), Sox2(120-319) (**B**) and Sox11 (**C**) to RNA probes derived from *Dnmt3b* and *Dicer1* mRNAs. Concentrations of Sox2 constructs are labelled above each lane. Free RNA and protein-RNA complex are marked.

**Supplementary Table 1. Randomly selected DNA sequences from the RNA library.**

| Number | Sequence                   |
|--------|----------------------------|
| 1      | GCGGGATGGTTAGGTGCGCCCTGTT  |
| 2      | CGAGGTACACACTTAGGTTATATCG  |
| 3      | AGTCTATCTTTCGTTCAAGATATGC  |
| 4      | CATACCTCGCTCAAACCTTGCCTCTG |
| 5      | TGCATCGGTCCTGCCTTGTCATCGA  |
| 6      | TTTCCTAGCCCACTCCGAGCCTGGT  |
| 7      | TTGGTATTCTTGATACATACATATT  |
| 8      | CTAGGAGCCGACGAAGCATAAACGC  |
| 9      | AGATGTTTGCTGCAATGGATCCGTT  |
| 10     | TAGCGAATCTCCAAATCGTATTAGG  |
| 11     | TTGACGAGCGCCTCGAAAATCTCT   |
| 12     | TAGCGTTTGTGTAAGGGCATCGGGC  |
| 13     | TTTCAGGGGGGCGGGTCAGTAGTTT  |
| 14     | CGAATTGTGATGGCCTGTAACATTA  |
| 15     | CATCTATCGGACGCATTGCAGGCGC  |
| 16     | ACGCGTTGAGCCCCGCCCACGCTT   |
| 17     | TCCTAAGCTCCGTTATCTTCCCTCA  |

**Supplementary Table 2. The sequences of 51 unique RNAs bound to Sox2 after 12 cycles of SELEX.**

| <b>NO.</b>           | <b>Sequence</b>                                             |
|----------------------|-------------------------------------------------------------|
| 12 <sup>th</sup> -1  | UGACU <u>CCC</u> ACAUUAUUC <u>GUG</u> GUACA                 |
| 12 <sup>th</sup> -2  | GCCAG <u>CCC</u> CAUUAUUG <u>GCG</u> CUCCUUGU               |
| 12 <sup>th</sup> -3  | GCCGG <u>CCC</u> AGAG <u>GCG</u> UACAUCAGUC                 |
| 12 <sup>th</sup> -4  | UUGACGCU <u>GCG</u> <u>CCU</u> CAC <u>GCC</u> UUGU          |
| 12 <sup>th</sup> -5  | GACUCG <u>CCCC</u> UCACGUC <u>CCCC</u> UGA                  |
| 12 <sup>th</sup> -6  | CCAAGU <u>CCC</u> G <u>CCG</u> GAUUUUGCCUA                  |
| 12 <sup>th</sup> -7  | GCUCUG <u>CCC</u> ACGUG <u>GCG</u> UUUUCUAC                 |
| 12 <sup>th</sup> -8  | GCGGUUUG <u>CCC</u> AUGCUAC <u>GCG</u> UGUA                 |
| 12 <sup>th</sup> -9  | GCGGUCCG <u>CCC</u> AUGCCUUC <u>GCG</u> UCA                 |
| 12 <sup>th</sup> -10 | GCGGUUCG <u>CCC</u> AUGCCUC <u>GCG</u> CCA                  |
| 12 <sup>th</sup> -11 | GCGGUUCG <u>CCC</u> AGCCUC <u>GCG</u> UCAUA                 |
| 12 <sup>th</sup> -12 | GCGGUUCG <u>CCC</u> AGCCU <u>GCG</u> UCAUG                  |
| 12 <sup>th</sup> -13 | GCGGUUCG <u>CCC</u> AGCCU <u>GCG</u> UCAUG                  |
| 12 <sup>th</sup> -14 | GCAACGACG <u>CCC</u> UAC <u>CCU</u> <u>CCC</u> U <u>CCC</u> |
| 12 <sup>th</sup> -15 | GCGGCAAG <u>CCC</u> CAUACUC <u>GCG</u> GUCAA                |
| 12 <sup>th</sup> -16 | GG <u>GCG</u> GUAAG <u>CCC</u> CAGUC <u>GCG</u> CCG         |
| 12 <sup>th</sup> -17 | GCCGG <u>CCC</u> GCAAUAG <u>GCG</u> CUACUUC                 |
| 12 <sup>th</sup> -18 | GCGCCGG <u>CCCC</u> CAGG <u>GCG</u> CUAGUUUC                |
| 12 <sup>th</sup> -19 | GCGCCGG <u>CCCC</u> UUCGG <u>GCG</u> CUGGCCU                |
| 12 <sup>th</sup> -20 | UCAGCCGGUG <u>CCC</u> GACGGAUGGAA                           |
| 12 <sup>th</sup> -21 | <u>ACGCG</u> GG <u>CCC</u> UCCG <u>GCG</u> CUCUUAUC         |
| 12 <sup>th</sup> -22 | GCGGUGU <u>CCC</u> GCU <u>GCG</u> CUACUUCA                  |
| 12 <sup>th</sup> -23 | ACGCCUUG <u>CCC</u> AUAAGCG <u>GCG</u> CUAU                 |
| 12 <sup>th</sup> -24 | <u>GCGG</u> CUUG <u>CCC</u> AU <u>GCG</u> GUGUAG            |
| 12 <sup>th</sup> -25 | CCCCGUAC <u>CCC</u> UCGG <u>GCG</u> GGUUAUCA                |
| 12 <sup>th</sup> -26 | ACGCUCGG <u>CCC</u> ACGUCGG <u>GCG</u> UAAA                 |
| 12 <sup>th</sup> -27 | GCGGUAC <u>CCCC</u> <u>GCG</u> UUUUGCGAAUU                  |
| 12 <sup>th</sup> -28 | <u>GCGCG</u> GG <u>CCC</u> AAGCUUC <u>GCG</u> CUUGG         |
| 12 <sup>th</sup> -29 | <u>CGCG</u> GG <u>CCC</u> AUUGAAC <u>GCG</u> CAU            |
| 12 <sup>th</sup> -30 | GCGGAAAG <u>CCC</u> ACAU <u>GCG</u> UCAU                    |
| 12 <sup>th</sup> -31 | <u>GCGCG</u> GAAAG <u>CCC</u> ACCUUC <u>GCG</u> CUC         |
| 12 <sup>th</sup> -32 | <u>GCGCG</u> GAAUG <u>CCC</u> GAAUC <u>GCG</u> CGCA         |
| 12 <sup>th</sup> -33 | <u>GCGCG</u> GAAUG <u>CCC</u> AUGAUUC <u>GCG</u> CA         |
| 12 <sup>th</sup> -34 | <u>GCGCG</u> GAAU <u>CCC</u> AUGUCUC <u>GCG</u> CA          |

|                      |                                                     |
|----------------------|-----------------------------------------------------|
| 12 <sup>th</sup> -35 | <u>CGCG</u> GAA <u>ACC</u> CAGACU <u>CGCG</u> GCCCA |
| 12 <sup>th</sup> -36 | <u>CGCG</u> GAAG <u>CCC</u> UGAGU <u>CGCG</u> GUAGG |
| 12 <sup>th</sup> -37 | <u>CGCG</u> GAAG <u>CCC</u> UGAAU <u>CGCG</u> GUAGG |
| 12 <sup>th</sup> -38 | <u>CGCG</u> GAAG <u>CCC</u> AAUGU <u>CGCG</u> GGAA  |
| 12 <sup>th</sup> -39 | GCGGAA <u>CCC</u> AUACU <u>CGCG</u> UUCAA           |
| 12 <sup>th</sup> -40 | GCGGUG <u>CCC</u> AGUAG <u>CGCU</u> AAGAA           |
| 12 <sup>th</sup> -41 | <u>CGCG</u> GUAC <u>CCC</u> AUACU <u>CGCG</u> GGG   |
| 12 <sup>th</sup> -42 | GCGGUAG <u>CCC</u> AGU <u>CGCG</u> CUCUUA           |
| 12 <sup>th</sup> -43 | <u>CGCG</u> GAA <u>CCC</u> CACACCU <u>CGCG</u> GGC  |
| 12 <sup>th</sup> -44 | GCGGUAC <u>CCC</u> CAU <u>CGCG</u> UUCUGAG          |
| 12 <sup>th</sup> -45 | <u>CGCG</u> GAA <u>CCC</u> ACAUC <u>CGCG</u> GUAUGA |
| 12 <sup>th</sup> -46 | CCCGGAAG <u>CCC</u> AGAUC <u>CGGG</u> GUGUUA        |
| 12 <sup>th</sup> -47 | CCCCGAAG <u>CCC</u> AGAUC <u>CGGG</u> GUGUUA        |
| 12 <sup>th</sup> -48 | <u>ACGCG</u> GAAG <u>CCC</u> AGGU <u>CGCG</u> CUUUA |
| 12 <sup>th</sup> -49 | <u>ACGCG</u> GAA <u>CCC</u> AGGU <u>CGCG</u> CUUUA  |
| 12 <sup>th</sup> -50 | GCGGUAC <u>CCC</u> AGCU <u>CGCU</u> UCGUG           |
| 12 <sup>th</sup> -51 | <u>GCGCG</u> UAAG <u>CCC</u> AU <u>CGCG</u> CUACU   |

The enriched motifs are underlined.

**Supplementary Table 3. Sequences for RNAs and DNAs used for binding assays.**

| <b>Name</b>               | <b>Sequence</b>                                            |
|---------------------------|------------------------------------------------------------|
| 12 <sup>th</sup> -15      | 5'-GCGGCAAGCCCAUACUCGCGUUCAA-3'                            |
| 12 <sup>th</sup> -24      | 5'-CGCGGCUUGCCCUAUCGCGGUGUAG-3'                            |
| 12 <sup>th</sup> -24 Mut1 | 5'- <u>UAU</u> AGCUUGCCCUAUCGCGGUGUAG-3'                   |
| 12 <sup>th</sup> -24 Mut2 | 5'-CGCGGCUUG <u>UUUU</u> AUCGCGGUGUAG-3'                   |
| 12 <sup>th</sup> -24 Mut3 | 5'-CGCGGCUUGCCCUAU <u>UAU</u> AGUGUAG-3'                   |
| 12 <sup>th</sup> -24 Mut4 | 5'-CGCGGCUUG <u>GGG</u> UAUCGCGGUGUAG-3'                   |
| 12 <sup>th</sup> -24 Mut5 | 5'-CGCGGCUUG <u>AAA</u> AUCGCGGUGUAG-3'                    |
| 12 <sup>th</sup> -24 Mut6 | 5'- <u>UAU</u> AGCUUG <u>AAA</u> UAU <u>UAU</u> AGUGUAG-3' |
| RL                        | 5'-CACACACACACACACACACACAC-3'                              |
| <i>Dnmt3b</i> RNA         | 5'-CAGCUUUUCCUGUAGUCAUGAAUG-3'                             |
| <i>Dicer1</i> RNA         | 5'-CCUGCAGCUCAUGACCCUGCUUCC-3'                             |
| Sox2/Prox1 DNA            | 5'-CTAGCATTGTCTGGG-3'<br>3'-GATCGTAACAGACCC-5'             |

Substituted bases were underlined.

**Supplementary Table 4. Primers used for plasmid constructions.**

|                                             | <b>Sequence</b>                                                                     |
|---------------------------------------------|-------------------------------------------------------------------------------------|
| For protein expression plasmid construction |                                                                                     |
| Sox2- forward                               | GGAATTCC <u>CATATG</u> TATAACATGATGGAGACGGAGC                                       |
| Sox2-reverse                                | CCGCTCGAGTCACATGTGCGACAGGGGCA                                                       |
| Sox2(1-180) -reverse                        | CCGCTCGAGTCACAGCTGCTCCTGCATCATGCTGT                                                 |
| Sox2(1-120)-reverse                         | CCGCTCGAG TCA CTTGGTTTTCCGCCGCGGC                                                   |
| Sox2-HMG- forward                           | GGAATTCC <u>CATATG</u> GACCGCGTCAAGAGGCCCATGAA CGCC                                 |
| Sox2-HMG-reverse                            | CCGCTCGAGTCACTTGGTTTTCCGCCGCGGCC                                                    |
| Sox2-ΔHMG(1-40)-reverse                     | GTACTTATCCTTCTTCATGAGCGTCGGGCTGTTCTTCTGGTTGC                                        |
| Sox2-ΔHMG(119-319)- forward                 | GCAACCAGAAGAACAGCCCGACGCTCATGAAGAAGGATAAGTAC                                        |
| Sox11- forward                              | GGAATTCC <u>CATATG</u> GTGCAGCAGGCCGAG                                              |
| Sox11-reverse                               | CCGCTCGAGTCAATACGTGAACACCAGGTC                                                      |
| Sox11N2C- forward                           | GCCGCGCAAAAAGCCCAAGACGCTCATGAAGAAGGATAAGTACA                                        |
| Sox11N2C-reverse                            | TGACTTATCCTTCTTCATGAGCGTCTTGGGCTTTTTGCGCGGC                                         |
| For retroviral plasmid construction         |                                                                                     |
| V-Sox2- forward                             | CGCGGATCC <u>TATAACATGATGGAGACGGAGC</u>                                             |
| V-Sox2-reverse                              | CCGCTCGAGTCACATGTGCGACAGGGGCA                                                       |
| V-Sox2(1-180) -reverse                      | CCGCTCGAGTCACAGCTGCTCCTGCATCATGCTGT                                                 |
| V-Sox2(1-120)-reverse                       | CCGCTCGAGTCACTTGGTTTTCCGCCGCGGC                                                     |
| V-Sox2-HMG-forward                          | CGCGGATCCGACCGCGTCAAGAGGCCCATGAA CGCC                                               |
| V-Sox2-HMG-reverse                          | CCGCTCGAGTCACTTGGTTTTCCGCCGCGGCC                                                    |
| V-Sox11- forward                            | CGCGGATCCGTGCAGCAGGCCGAG                                                            |
| V-Sox11-reverse                             | CCGCTCGAGTCAATACGTGAACACCAGGTC                                                      |
| V-Sox2-FLAG-reverse                         | CCGCTCGAGT <b>CACTTGTATCGTCCTTGTAGTC</b> GGAGAATTCGTATAC<br>ACTAGTCATGTGCGACAGGGGCA |

The underlined are restriction sites. Sequence for FLAG tag is highlighted in bold face.



**Supplementary Table 5. Oligos used for RNA SELEX library construction.**

| <b>Name</b>    | <b>Sequence</b>                                               |
|----------------|---------------------------------------------------------------|
| DNA library    | 5'-TGGGCACTATTTATATCAAC(N) <sub>25</sub> AATGTCGTTGGTGGCCC-3' |
| Forward primer | 5'-CCCGACACCCGCGG ATCCATGGGCACTATTTATATCAAC-3'                |
| Reverse primer | 5'-CGCGGATCCTAATACGACTCACTATAGGGGCCACCAACGACATT-3'            |

The T7 promoter sequence is underlined.

**Supplementary Table 6. Primers used for ChIP-qPCR.**

|                     | <b>Sequence</b>         |
|---------------------|-------------------------|
| ChIP-Sox2-forward   | AGTTCCCAGTCCAAGCTAGG    |
| ChIP-Sox2-reverse   | CCGTCATTTGGGTCTTTATTCAA |
| ChIP-Rest-forward   | CCATTGGCCTATTTGCATCAC   |
| ChIP-Rest-reverse   | AGAGGGATCACAGCCTAGTC    |
| ChIP-Nanog-forward  | CAAGGCTAGCGATTACACC     |
| ChIP-Nanog-reverse  | AATAGGGAGGAGGGCGTCTA    |
| ChIP-Fbxo15-forward | TTTGACTTATTGCACGGCCC    |
| ChIP-Fbxo15-reverse | GCAGCCAGGGATTCTTGTC     |
| ChIP-Atg7-forward   | GAGCCCTGTTCTTACTCTAGTCA |
| ChIP-Atg7-reverse   | AAATACAGGGATGCACACCG    |

**Supplementary Table 7. Primers used for RT-PCR and qRT-PCR.**

|                                             | <b>Sequence</b>           |
|---------------------------------------------|---------------------------|
| For RT-PCR                                  |                           |
| Exo-Sox2-forward                            | GGGTGGACCATCCTCTAGAC      |
| Exo-Sox2-reverse                            | GGGCTGTTCTTCTGGTTG        |
| Cy5-Srebf1-forward                          | ATCAAAGAGGAGCCAGTGCC      |
| Srebf1-reverse                              | TGTCAGCAGCAGTGAGTCTG      |
| Cy5-Ctbp1-forward                           | AGCTCCCACTTGCTCAACAA      |
| Ctbp1-reverse                               | GCTACTGTGGCCACATCCTT      |
| Cy5-Dnmt3b-forward                          | CCCAGTGATGATCGATGCCA      |
| Dnmt3b-reverse                              | ATGACCGGTACACTCCAGGA      |
| Cy5-Lef1-forward                            | ACCTTCTACCCCTGTCTCC       |
| Lef1-reverse                                | GGTGCTCCTGTTTGACCTGA      |
| Cy5-Prmt9-forward                           | CCTGTGATGTAGTGGCTGCA      |
| Prmt9-reverse                               | ATCTCTGCACACTCGACTGC      |
| Cy5-Dicer1-forward                          | ACTCTGAAAGAACTTAGAGTCAGCA |
| Dicer1-reverse                              | TGAGCCAGTGTTCAAGCACA      |
| Cy5-Tada2a-forward                          | CCCTCTGTTTGCATCCACCCTG    |
| Tada2a-reverse                              | CATGTAAGATGTCTGAGTCGTCTTC |
| Cy5-Gapdh-2-forward                         | CCAGGAGCGAGACCCCACTA      |
| Gapdh-2-reverse                             | GCAGTGATGGCATGGACTGTGGT   |
| For RIP qRT-PCR using cell lysate           |                           |
| Srebf1-forward                              | GGCTATTCCGTGAACATCTCC     |
| Srebf1-reverse                              | TCCAAGGGCATCTGAGAACT      |
| Ctbp1-forward                               | CTCCAGGCGTCGTGAGTG        |
| Ctbp1-reverse                               | TCGTATGGTCTCTATCCGCC      |
| Prmt9-forward                               | CTGGTGGCACGGTCCTTG        |
| Prmt9-reverse                               | CTTCACGTCGTCTTTTAGCTC     |
| Dnmt3b-forward                              | GGCTTCCCTGCTCACTACA       |
| Dnmt3b-reverse                              | TGGGTAGAACTATTCACAGGCA    |
| Lef1-forward                                | GAGGCCTGTACAACAAGGGA      |
| Lef1-reverse                                | GGTGGAGAAAGGGACCCATT      |
| Dicer1-forward                              | AGCGGAGAGAACTTATGATGGA    |
| Dicer1-reverse                              | AGCTGTTAGGAACCTGAGGC      |
| Tada2a-forward                              | CCCTCTGTTTGCATCCACCCTG    |
| Tada2a-reverse                              | CATGTAAGATGTCTGAGTCGTCTTC |
| Gapdh-2-forward                             | CCAGGAGCGAGACCCCACTA      |
| Gapdh-2-reverse                             | GCAGTGATGGCATGGACTGTGGT   |
| RMST-forward                                | AATGTGACTTGGGACTGGCC      |
| RMST-reverse                                | CCGTTCTCTCCGAGGATTGA      |
| For qRT-PCR and transgene insertion testing |                           |
| exo-Oct4-forward                            | GGGTGGACCATCCTCTAGAC      |

|                                                       |                         |
|-------------------------------------------------------|-------------------------|
| exo-Oct4-reverse                                      | CCAGGTTTCGAGAATCCAC     |
| exo-Sox2-forward                                      | GGGTGGACCATCCTCTAGAC    |
| exo-Sox2-reverse                                      | GGGCTGTTCTTCTGGTTG      |
| exo-Klf4-forward                                      | GGGTGGACCATCCTCTAGAC    |
| exo-Klf4-reverse                                      | GCTGGACGCAGTGTCTTCTC    |
| exo-c-Myc-forward                                     | GGGTGGACCATCCTCTAGAC    |
| exo- c-Myc -reverse                                   | CCTCGTCGCAGATGAAATAG    |
| For qRT-PCR and selected pluripotency markers testing |                         |
| Oct4-forward                                          | GGGTGGACCATCCTCTAGAC    |
| Oct4-reverse                                          | CCAGGTTTCGAGAATCCAC     |
| Nanog-forward                                         | CTCAAGTCCTGAGGCTGACA    |
| Nanog-reverse                                         | TGAAACCTGTCCTTGAGTGC    |
| Esrrb-forward                                         | CAGAGTGCCTGGATGGAGAT    |
| Esrrb-reverse                                         | TACCAGGCGAGAGTGTTCTC    |
| Sall4-forward                                         | CCCTGGGAACTGCGATGAAG    |
| Sall4-reverse                                         | TCAGAGAGACTAAAGAACTCGGC |

## REFERENCES

1. Silva, J., O. Barrandon, J. Nichols, J. Kawaguchi, T.W. Theunissen, and A. Smith. (2008) Promotion of reprogramming to ground state pluripotency by signal inhibition. *PLoS Biol*, 6(10): p. e253.
2. Robinson, J.T., H. Thorvaldsdottir, W. Winckler, M. Guttman, E.S. Lander, G. Getz, and J.P. Mesirov. (2011) Integrative genomics viewer. *Nat Biotechnol*, 29(1): p. 24-6.

# Supplementary Figure 1

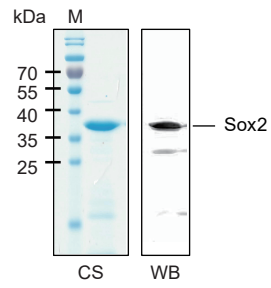

# Supplementary Figure 2

A.

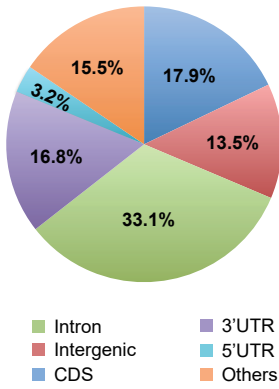

B.

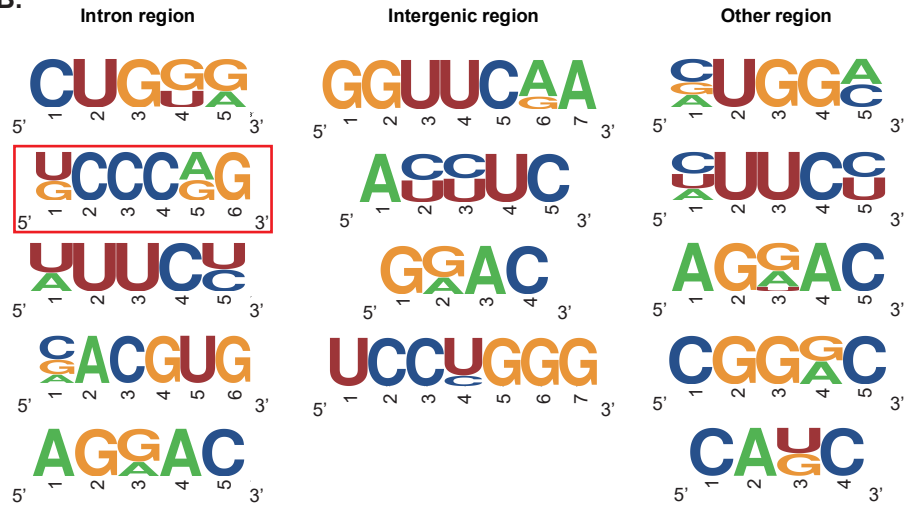

# Supplementary Figure 3

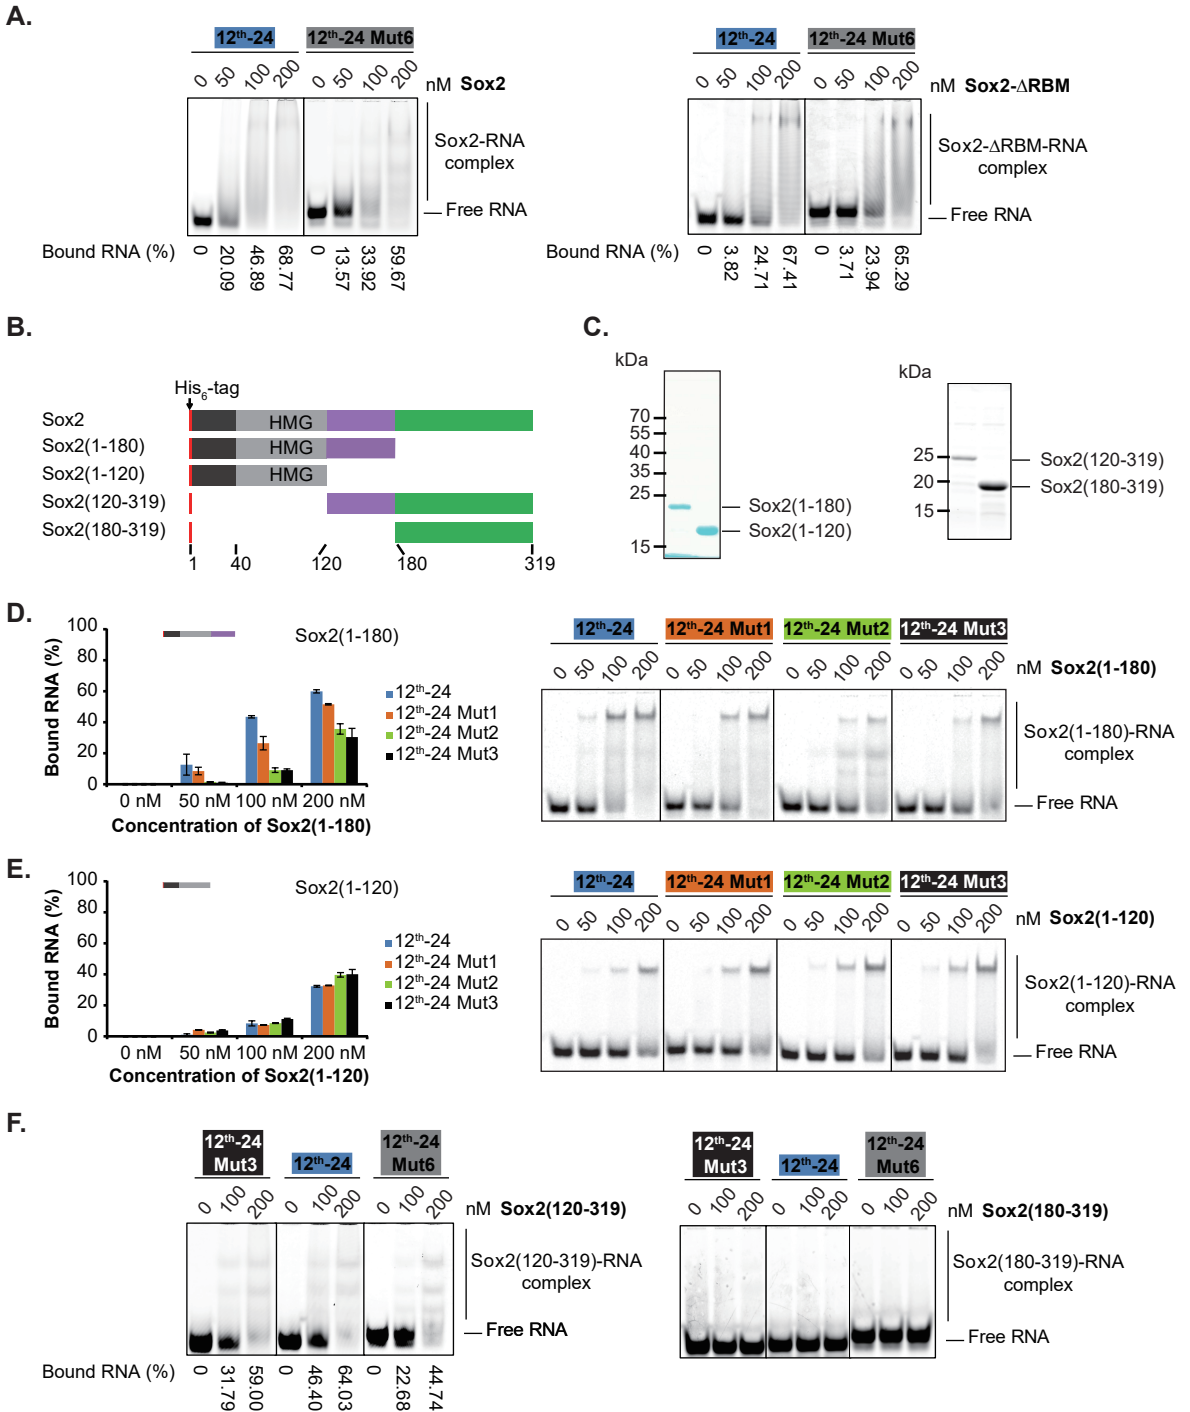



# Supplementary Figure 4

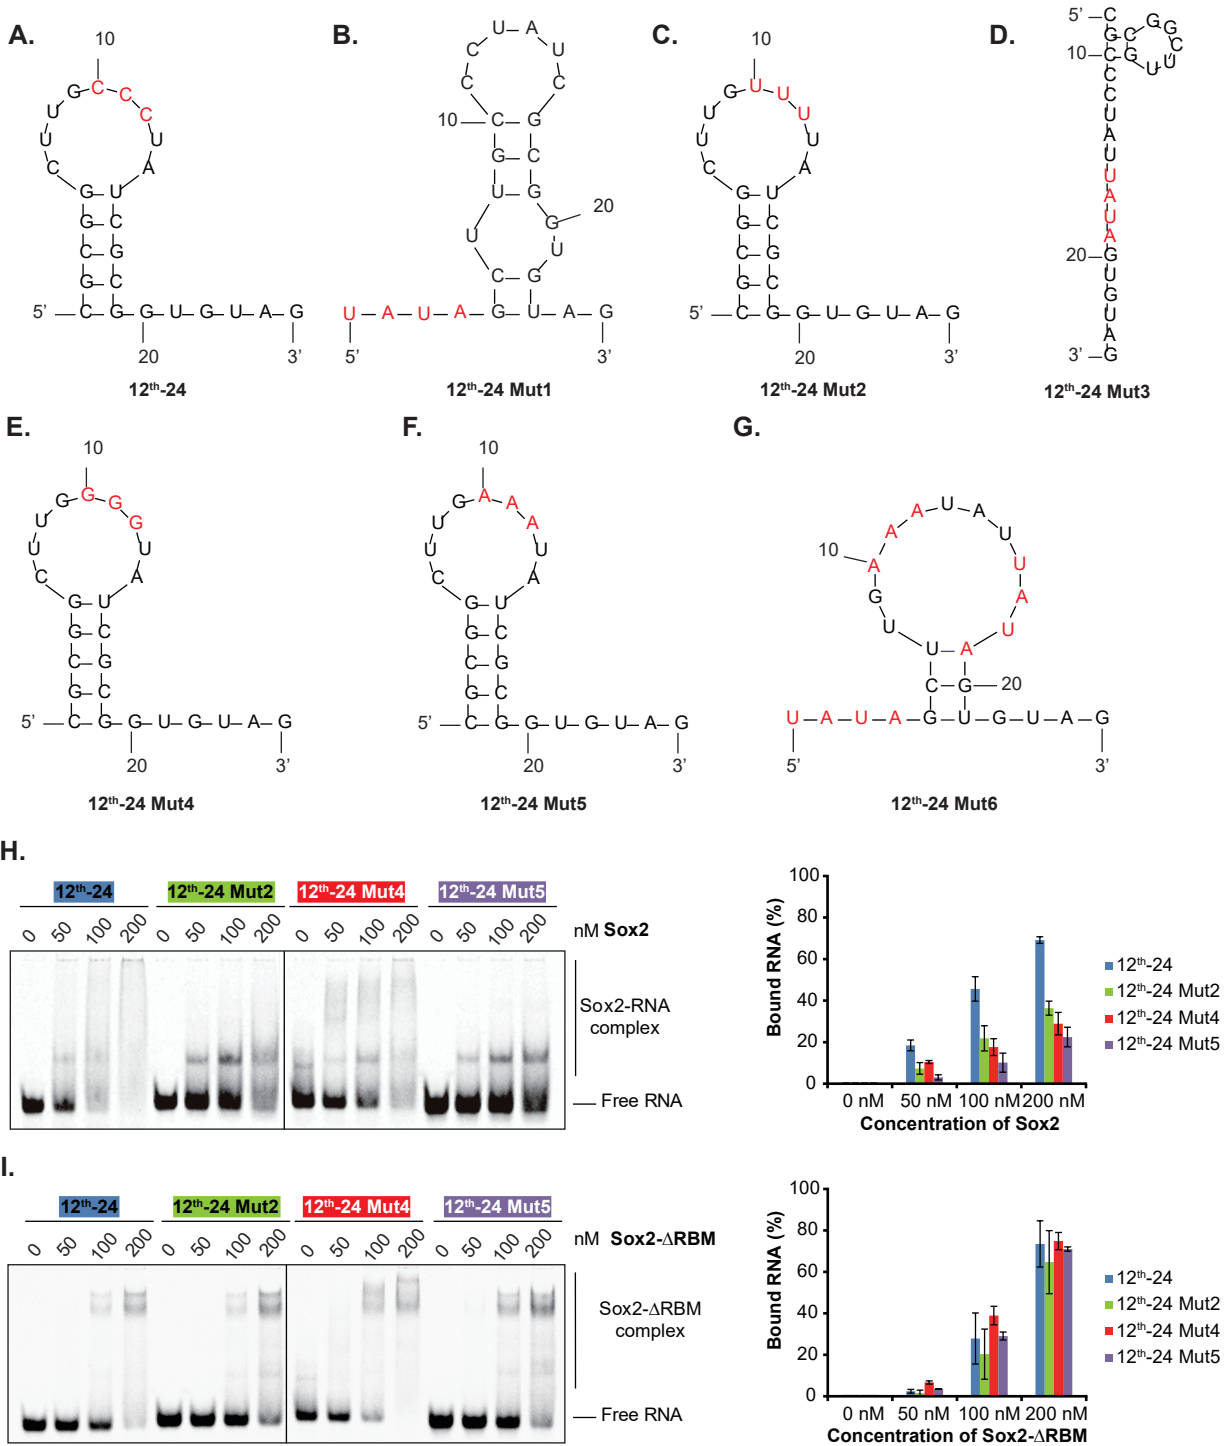

# Supplementary Figure 5

**A.**

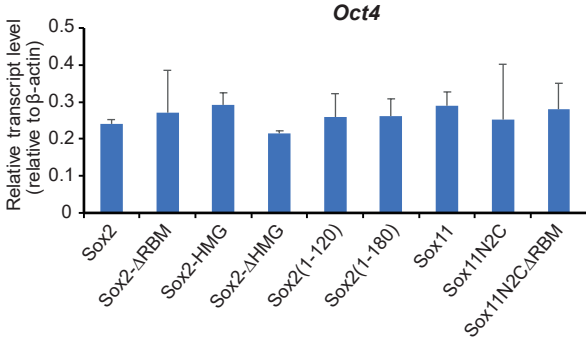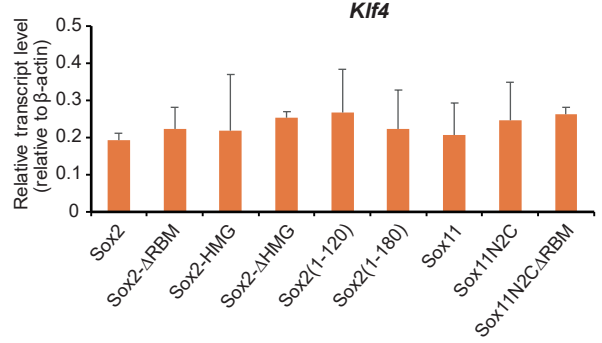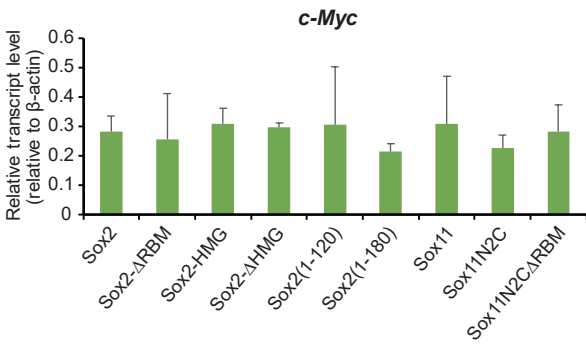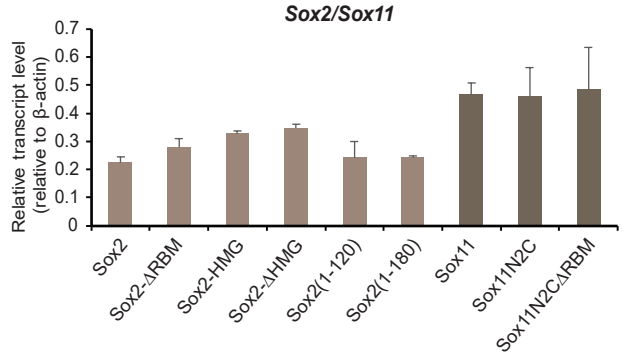

**B.**

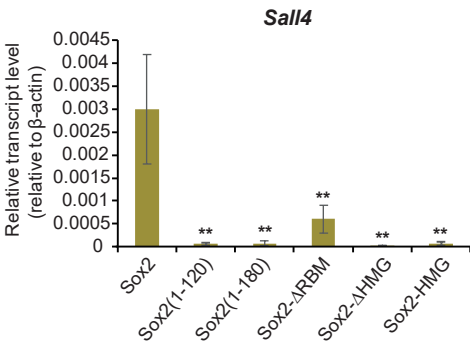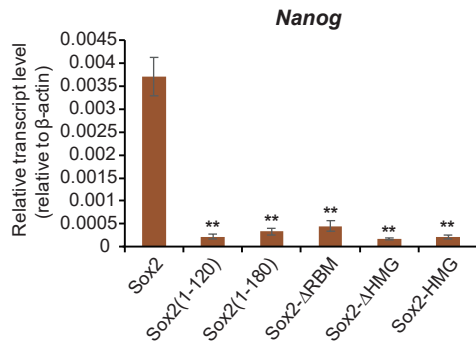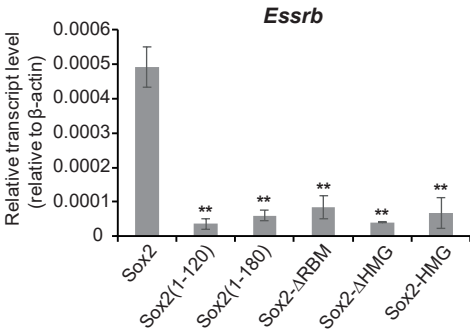

# Supplementary Figure 6

**A.**

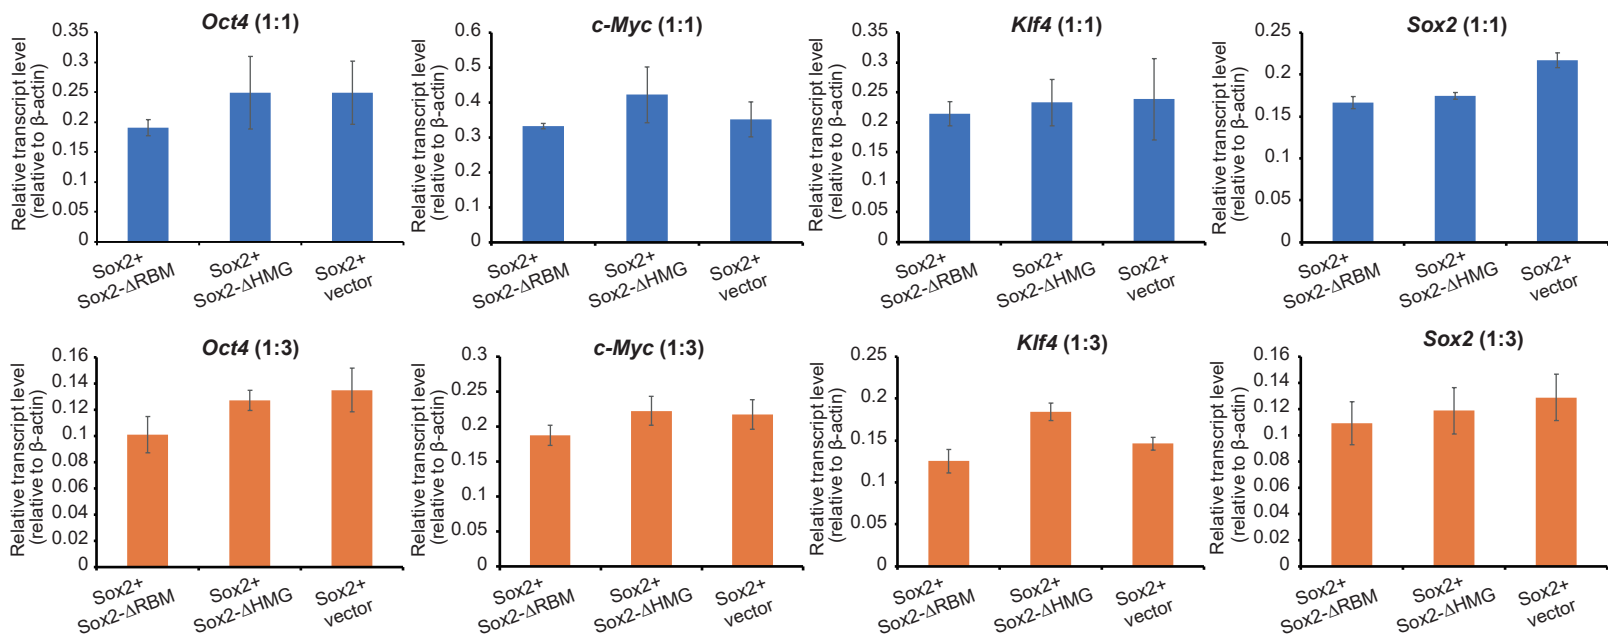

**B.**

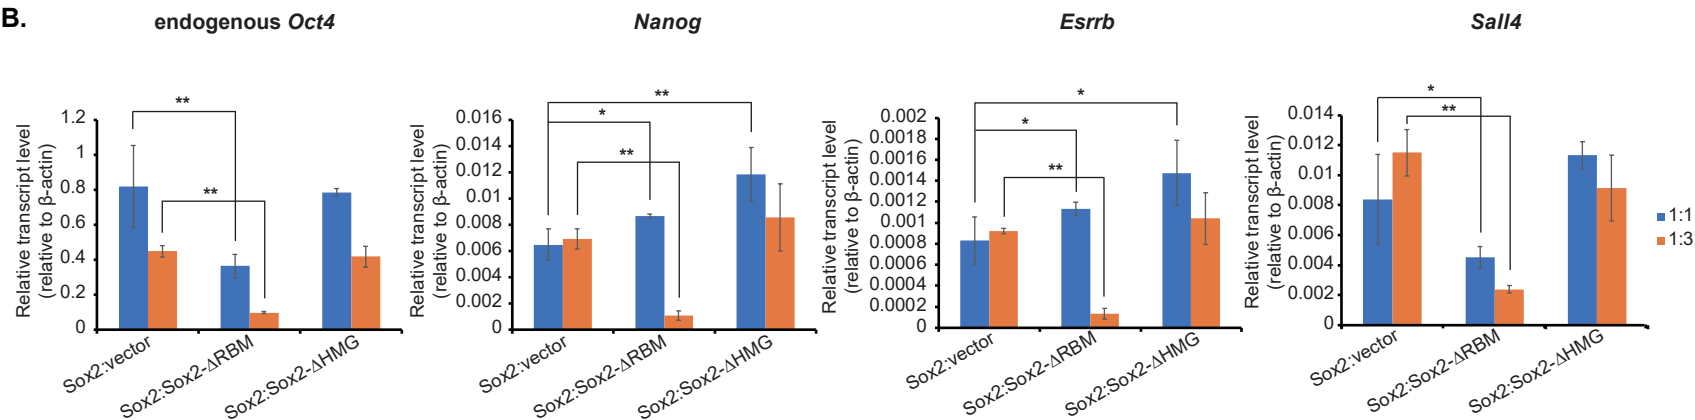

# Supplementary Figure 7

**A.**

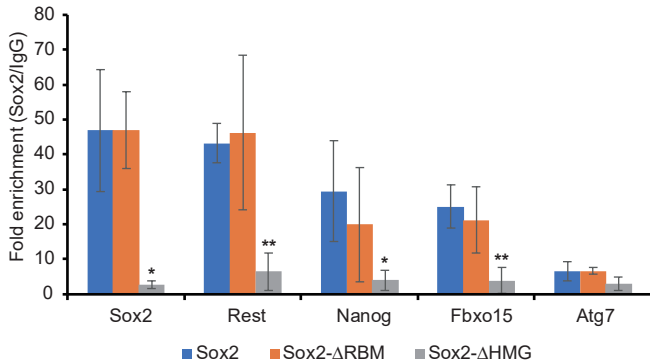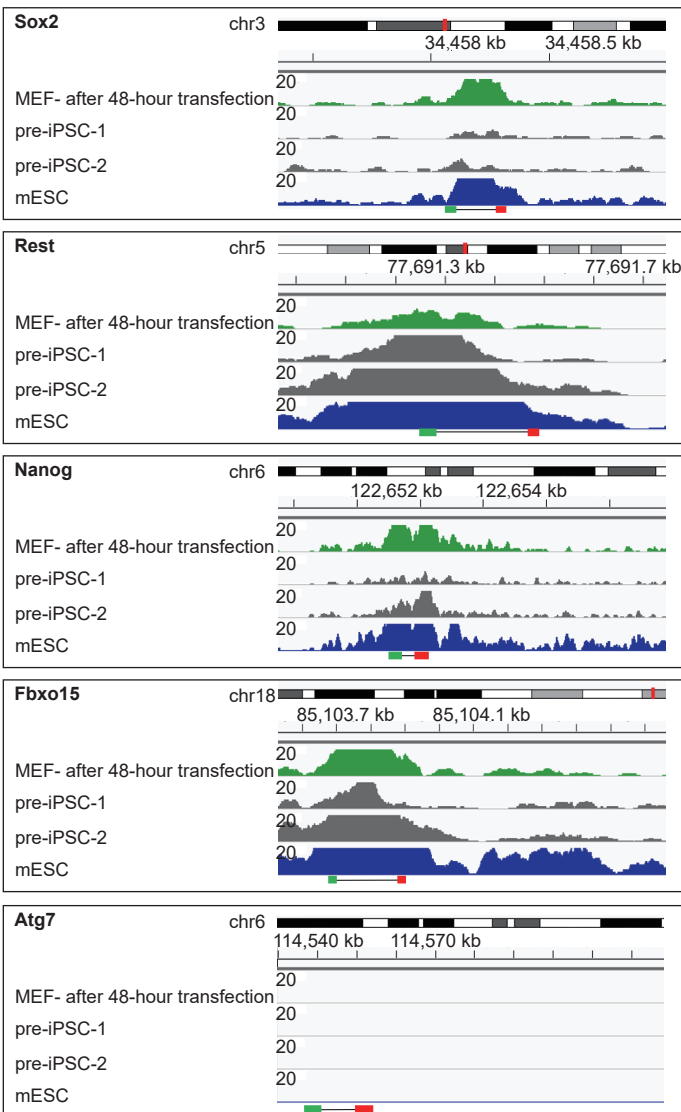

**B.**

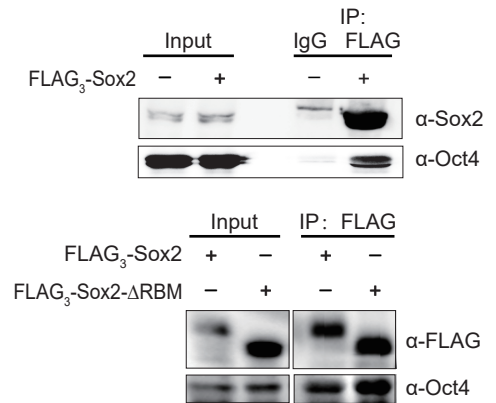

# Supplementary Figure 8

A.

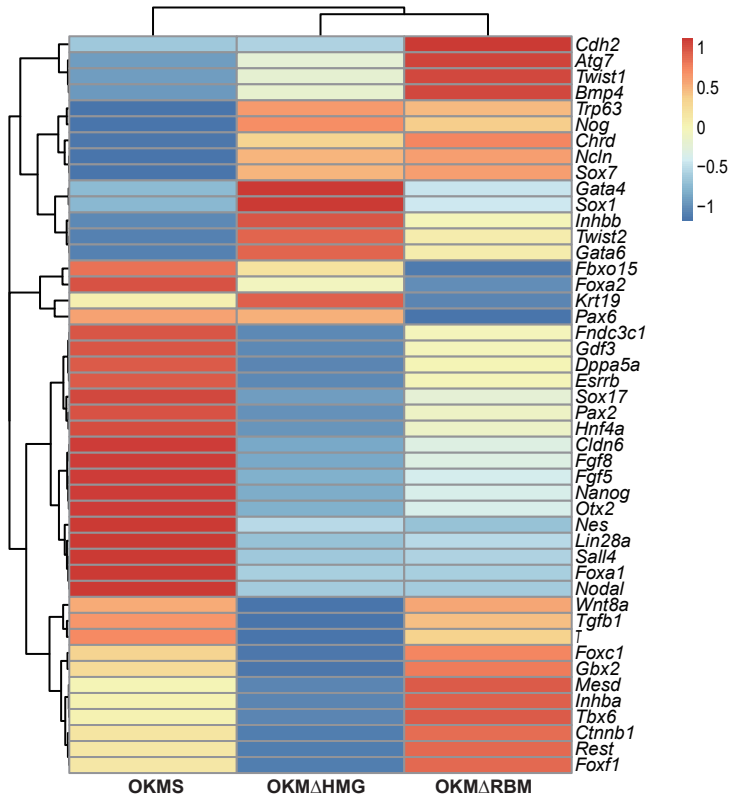

B.

OKMS vs OKM $\Delta$ HMG  
alternative splicing changed genes

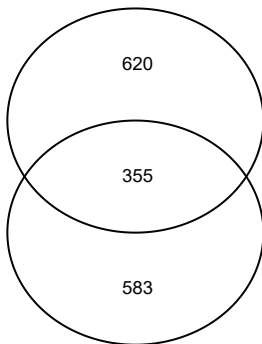

OKMS vs OKM $\Delta$ RBM  
alternative splicing changed genes

C.

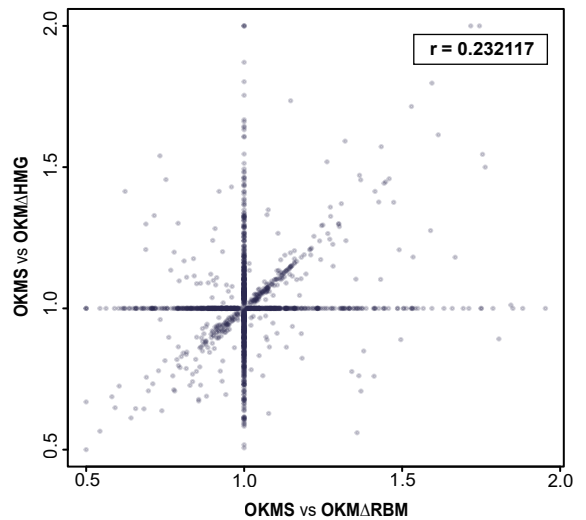

## Supplementary Figure 9

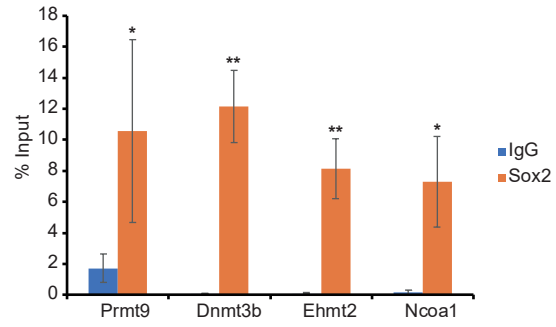

# Supplementary Figure 10

## Exons unaffected by AS

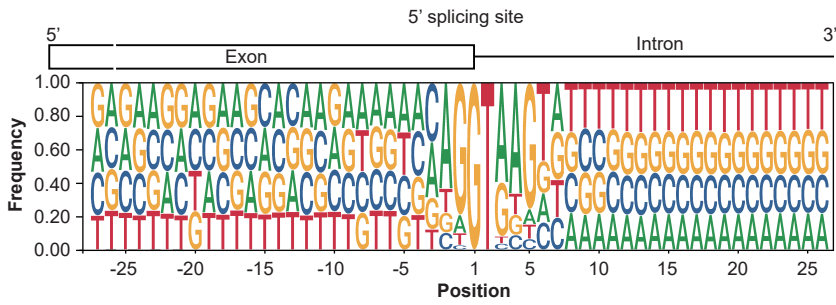

## Exons affected by AS

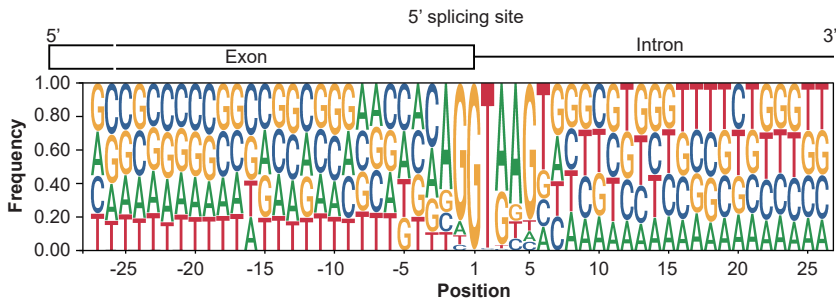

# Supplementary Figure 11

A.

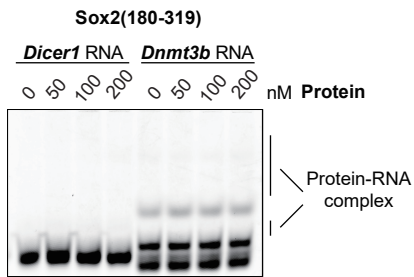

B.

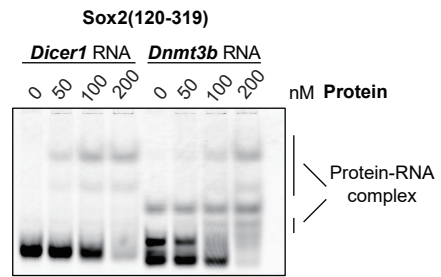

C.

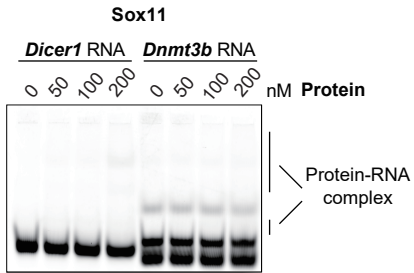

Supplement: gkaa067_supplemental_file.pdf [file gkaa067_supplemental_file.pdf]
